# Supplementary material for: Transcriptional signatures of schizophrenia in hiPSC-derived NPCs and neurons are concordant with post-mortem adult brains
Source: PubMed Central journal article supplement (PMC5738408; doi:10.1038/s41467-017-02330-5), 2017-12-20
Supplement: 41467_2017_2330_MOESM3_ESM.pdf [file 41467_2017_2330_MOESM3_ESM.pdf]

**File Name:** Supplementary Data 1

**Description:** Clinical and laboratory information about each individual and sample

**File Name:** Supplementary Data 2

**Description:** Clinical and laboratory metadata used bioinformatics analysis

**File Name:** Supplementary Data 3

**Description:** Quality control statistics for RNA-Seq data

**File Name:** Supplementary Data 4

**Description:** Biotype counts for expressed genes

**File Name:** Supplementary Data 5

**Description:** Differential expression analysis based on residual Sendai virus expression

**File Name:** Supplementary Data 6

**Description:** Gene set enrichments for residual Sendai virus differential expression analysis

**File Name:** Supplementary Data 7

**Description:** Coexpression modules and gene set enrichments

**File Name:** Supplementary Data 8

**Description:** Differential expression analysis between SZ and controls

**File Name:** Supplementary Data 9

**Description:** Gene set enrichments for cell type composition differential expression analysis
